# Supplementary material for: Nature inspired synthesis of magnetite nanoparticle aggregates from natural berthierine
Source: Royal Society of Chemistry journal article supplement (doi:10.1039/d3ra04065h), 2023-01-01
Supplement: d3ra04065h1.pdf [file d3ra04065h1.pdf]

1 **Supplementary file for:**  
2 **Characterization of natural magnetite nanoparticles aggregates from the Peña**  
3 **Colorada iron ore deposit, Mexico: genetic inferences**

4  
5 Alva-Valdivia, L. M. <sup>(1)</sup>, Agarwal A. <sup>(2)</sup>, Urrutia-Fucugauchi, J. <sup>(1)</sup> and Hernández-Cardona,  
6 A. <sup>(3)</sup>

7  
8(1) Laboratorio de Paleomagnetismo y Geofísica Nuclear, Instituto de Geofísica, Universidad  
9 Nacional Autónoma de México, México (DF) 04510 México.

10(2) Department of Earth Sciences, Indian Institute of Technology Kanpur, Kanpur, 208016, India

11(3) Posgrado en Ciencias de la Tierra, Instituto de Geofísica, Universidad Nacional Autónoma de  
12 México, Ciudad de México, 04510, México.

13

14

15

16

17 Supplementary Table 1. Chemical composition and structural formula of the MNA  
 18 (intergranular mineral; Mt, magnetite; B, berthierine; quartz, Q; calcite, C; and feldspar, Fl).

19

|                                | <i>PCA - 1</i> | <i>PCA - 2</i> | <i>PCA - 3</i> |
|--------------------------------|----------------|----------------|----------------|
| Fe <sub>2</sub> O <sub>3</sub> | 62.299         | 62.310         | 61.580         |
| FeO                            | 27.987         | 27.994         | 27.664         |
| TiO <sub>2</sub>               | 0.584          | 0.234          | 0.224          |
| MnO                            | 0.212          | 0.043          | 0.033          |
| NiO                            | 0.044          | ----           | 0.015          |
| Cr <sub>2</sub> O <sub>3</sub> | -----          | 0.024          | 0.024          |
| CoO                            | 0.118          | 0.144          | 0.101          |
| V <sub>2</sub> O <sub>3</sub>  | 0.163          | 0.160          | 0.156          |
| MgO                            | 0.297          | 0.037          | 0.088          |
| CaO                            | 0.005          | 0.018          | 0.199          |
| SiO <sub>2</sub>               | 0.057          | 0.042          | 0.052          |
| Al <sub>2</sub> O <sub>3</sub> | 0.379          | 0.399          | 0.417          |
| Na <sub>2</sub> O              | 0.065          | 0.102          | -----          |
| K <sub>2</sub> O               | -----          | 0.014          | -----          |
| <b>Σ</b>                       | <i>92.210</i>  | <i>91.512</i>  | <i>90.553</i>  |
| Fe <sub>+3</sub>               | 15.593         | 15.667         | 15.690         |
| Fe <sub>+2</sub>               | 7.786          | 7.821          | 7.833          |
| Ti                             | 0.146          | 0.058          | 0.057          |
| Mn                             | 0.559          | 0.012          | 0.010          |
| Ni                             | 0.012          | -----          | 0.004          |
| Cr                             | -----          | 0.008          | 0.008          |
| Co                             | 0.032          | 0.038          | 0.026          |
| V                              | 0.043          | 0.044          | 0.041          |
| Mg                             | 0.139          | 0.018          | 0.045          |
| Ca                             | 0.018          | 0.006          | 0.071          |
| Si                             | 0.018          | 0.014          | 0.018          |
| Al                             | 0.099          | 0.157          | 0.167          |
| Na                             | 0.039          | 0.064          | -----          |
| K                              | -----          | 0.004          | -----          |
| <b>Σ</b>                       | <i>24.484</i>  | <i>23.911</i>  | <i>23.970</i>  |

20

21

22 Supplementary Table 2. XRD analyses of MNA after annealing at 650 °C and 750 °C, and  
 23 650 °C (second run).

| Mineral   | Concentrated MNA | Annealed at 650°C | Annealed at 750°C | Annealed at 650°C (second round) |
|-----------|------------------|-------------------|-------------------|----------------------------------|
| Magnetite | x                | x                 |                   | x                                |
| Maghemite |                  | x                 | x                 | x                                |
| Hematite  |                  | x                 | x                 | x                                |

24

25 Supplementary Table 3. Magnetic susceptibility vs. frequency measurements during  
 26 laboratory synthesis of magnetite nanoparticles after annealing at 650 °C, 750 °C and 650 °C  
 27 (second run).

28

| Sample                      | Magnetite nanoparticles | $\chi_{LF}$<br>10 <sup>-6</sup> m <sup>3</sup> Kg <sup>-1</sup> | $\chi_{HF}$<br>10 <sup>-6</sup> m <sup>3</sup> Kg <sup>-1</sup> | $\chi_{FD}$<br>10 <sup>-6</sup> m <sup>3</sup> Kg <sup>-1</sup> | $\chi_{FD}\%$ |
|-----------------------------|-------------------------|-----------------------------------------------------------------|-----------------------------------------------------------------|-----------------------------------------------------------------|---------------|
| PC7                         | ~ 2-8 nm                | 3.31                                                            | 2.88                                                            | 0.43                                                            | 13.0          |
| PC7 650 °C                  | ~ 2-8 nm                | 61.75                                                           | 57.05                                                           | 4.70                                                            | 7.6           |
| PC7 750 °C                  | ~ 2-8 nm                | 46.91                                                           | 43.86                                                           | 3.05                                                            | 6.5           |
| PC7 650 °C (second heating) | ~ 2-8 nm                | 11.20                                                           | 10.45                                                           | 0.75                                                            | 6.7           |

29

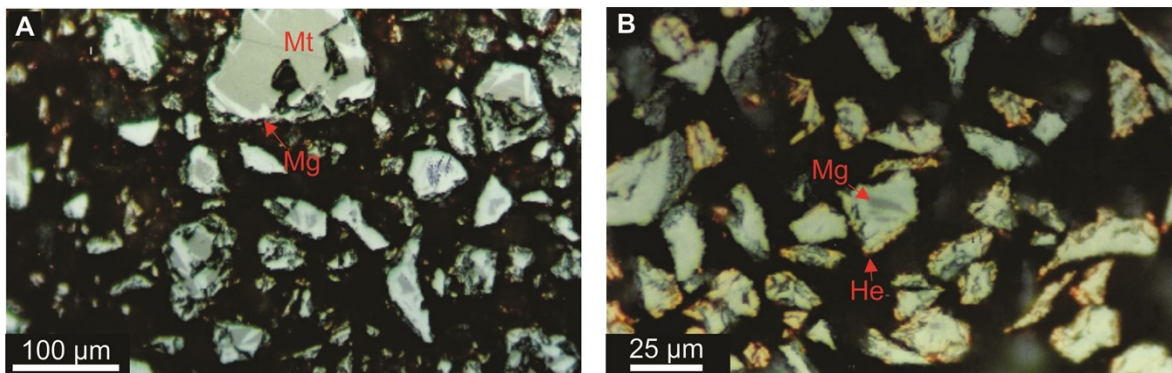

30

31

32 Supplementary Figure 1. Reflected light images presenting (a) MNAs annealed at 360 °C  
 33 with a crust of maghemite (Mg) and magnetite (Mt) cores, and (b) MNAs annealed at 750 °C  
 34 with crust of hematite (He) and maghemite (Mg) cores.

35

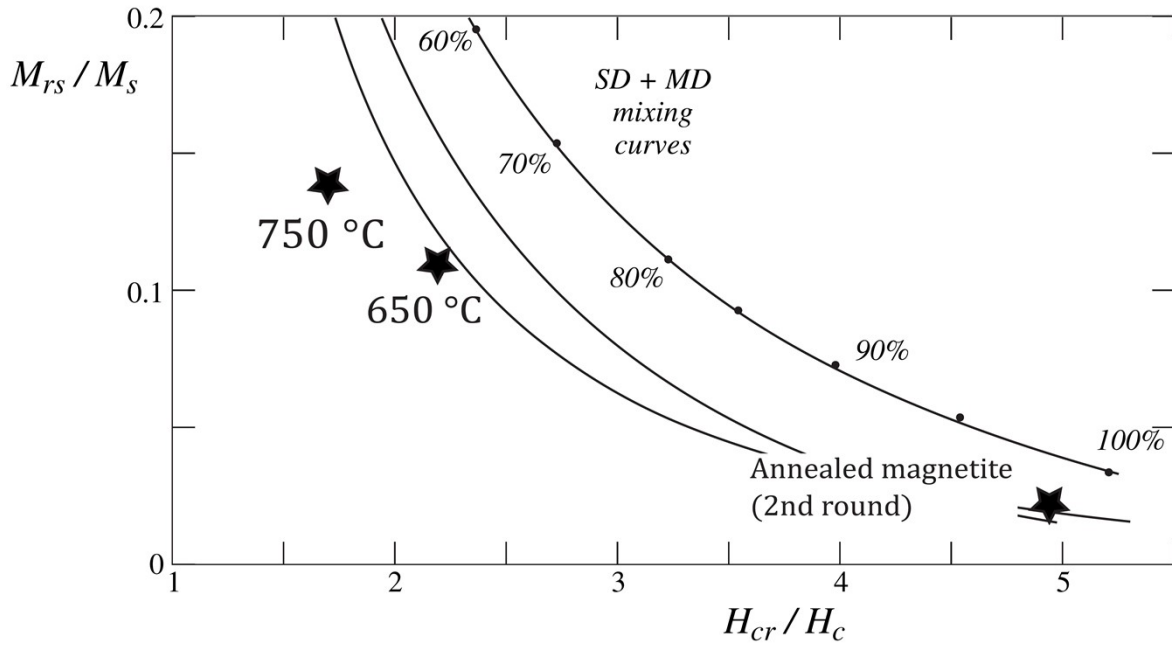

36

37 Supplementary Figure 2. Hysteresis parameter ratio plot (coercivity,  $H_{cr}/H_c$  and  
 38 magnetization,  $M_r/M_s$ ) of berthierine concentrate sample after annealing (Day et al, 1977).

39

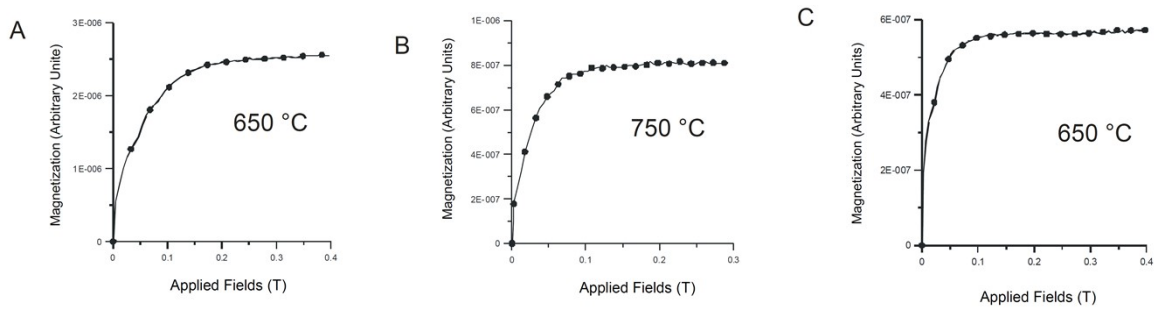

40

41 Supplementary Figure 3. IRM results of berthierine concentrate samples after annealing.

42
